# Supplementary material
Source: Springer Nature journal article supplement (https://www.springermedizin.de/resource/supplementary/12971_2013_229_MOESM2_ESM.docx/9595096)
Supplement: MOESM2 [file 9595096]

| (I) Respondents (J) Respondents | | Mean Difference of eCO (ppm)  (I-J) | Std. Error | Sig. |
| --- | --- | --- | --- | --- |
|
| Active Cigarette smokers | Passive Cigarette smokers | -.21 | .31 | 0.981 |
| Active Shisha smokers | -24.20 | 1.10 | <0.001 |
| Passive Shisha smokers | -14.83 | 2.43 | <0.001 |
| Passive Cigarette smokers | Active Cigarette smokers | .21 | .31 | 0.981 |
| Active Shisha smokers | -23.98 | 1.13 | <0.001 |
| Passive Shisha smokers | -14.61 | 2.44 | <0.001 |
| Active Shisha smokers | Active Cigarette smokers | 24.20 | 1.10 | <0.001 |
| Passive Cigarette smokers | 23.98 | 1.13 | <0.001 |
| Passive Shisha smokers | 9.36 | 2.66 | 0.010 |
| Passive Shisha smokers | Active Cigarette smokers | 14.83 | 2.43 | <0.001 |
| Passive Cigarette smokers | 14.61 | 2.44 | <0.001 |
| Active Shisha smokers | -9.36 | 2.66 | 0.010 |
| Mean difference of eCO Levels among different groups 30minutes after entering the venue | | | | |
